# Supplementary material for: Non-layered ZnSb nanoplates for room temperature infrared polarized photodetectors
Source: Royal Society of Chemistry journal article supplement (doi:10.1039/d0tc00755b), 2020-01-01
Supplement: d0tc00755b1.pdf [file d0tc00755b1.pdf]

## Supporting Information

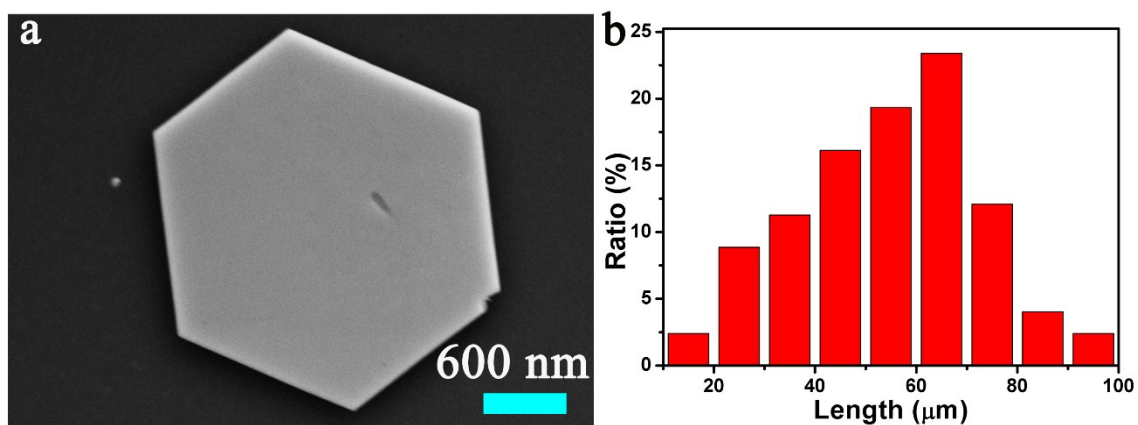

**Figure S1** a) High-magnification SEM image of the ZnSb nanoplate. b) Length distribution of the ZnSb nanoplates.

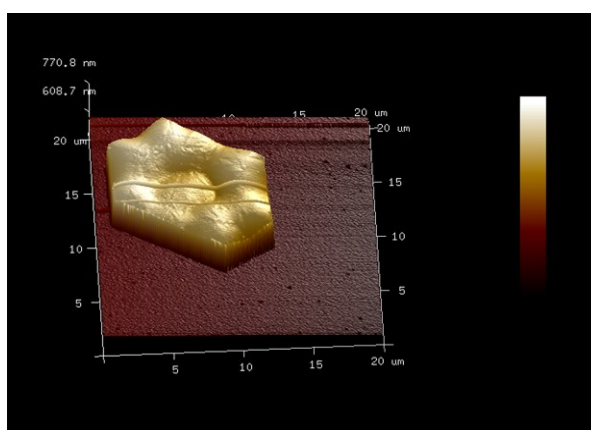

**Figure S2** Three-dimensional diagram of the ZnSb nanoplate.

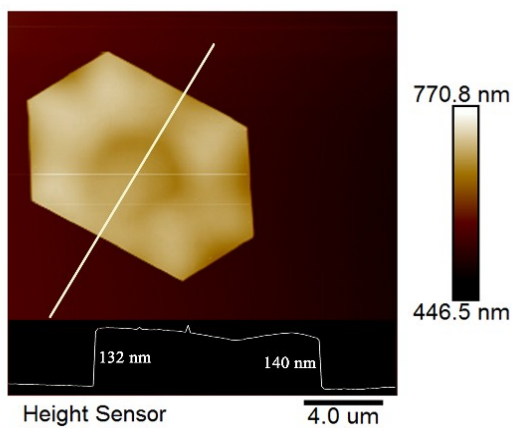

**Figure S3** AFM image of the corresponding ZnSb nanoplate.

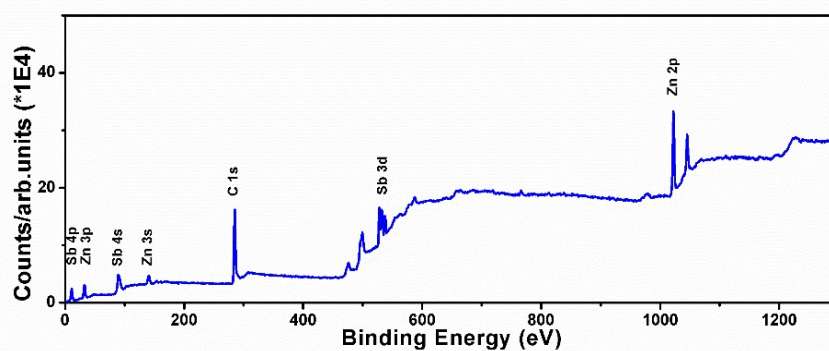

**Figure S4** XPS survey scan of the ZnSb nanoplates.

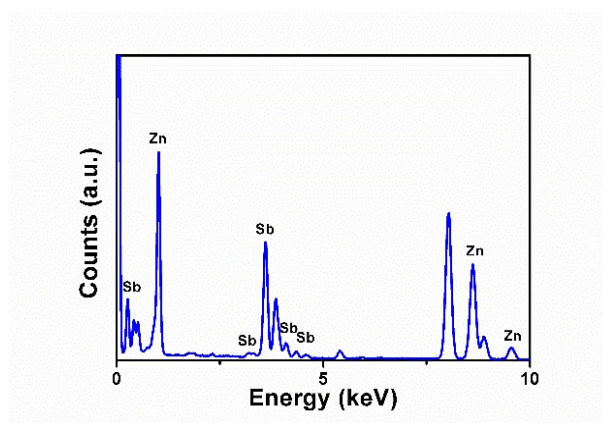

**Figure S5** EDX spectrum of the ZnSb nanoplates.

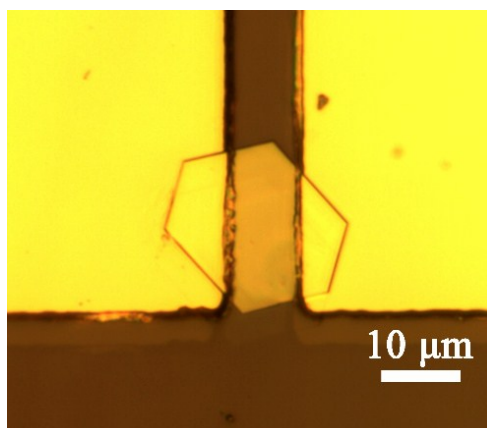

**Figure S6** Optical image of single micrometer-sized nanoplate-based device.

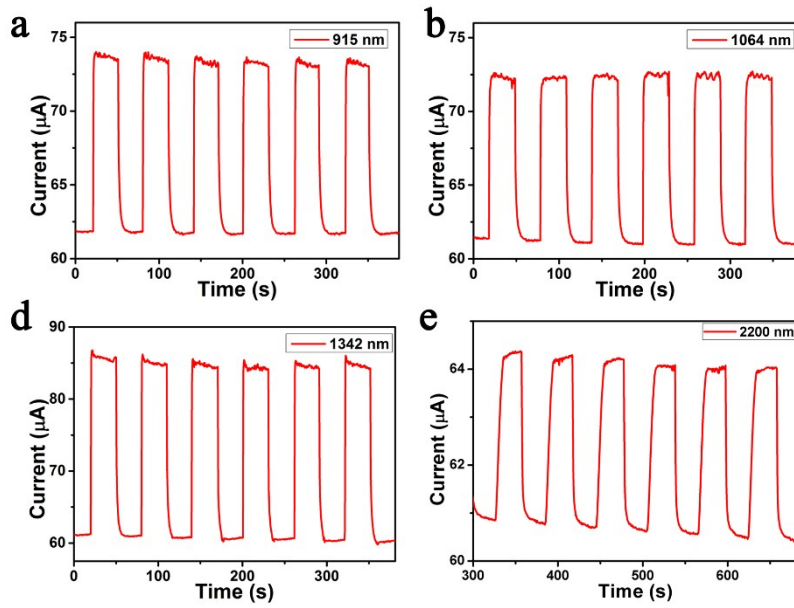

**Figure S7** a-e) *I-T* curves of the device with a bias of 0.5 V under the 915 nm, 102 mW/cm<sup>2</sup>; 1064 nm, 92 mW/cm<sup>2</sup>; 1342 nm, 200 mW/cm<sup>2</sup>; 2200 nm, 54 mW/cm<sup>2</sup> illumination at room temperature.

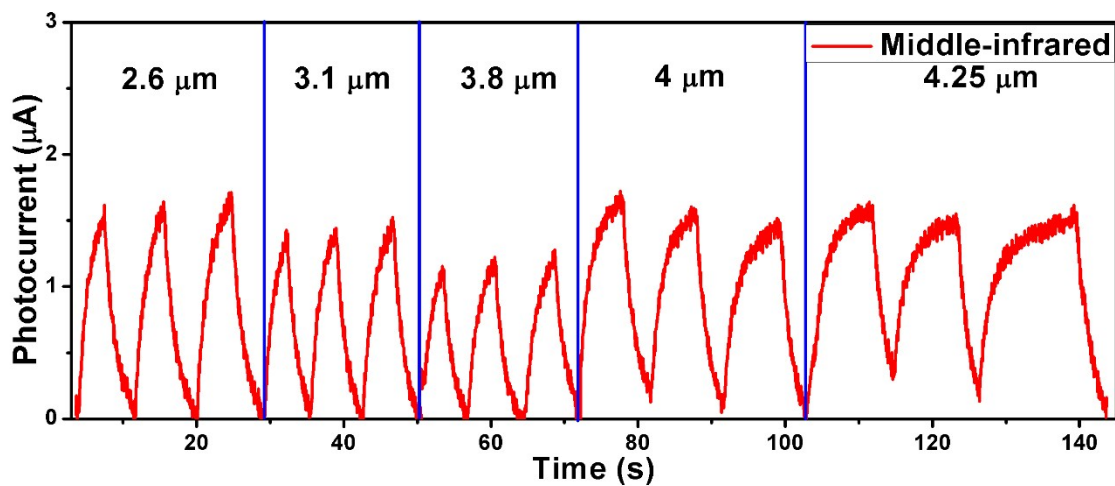

**Figure S8** The photocurrent of the device measured in the MIR at room temperature.

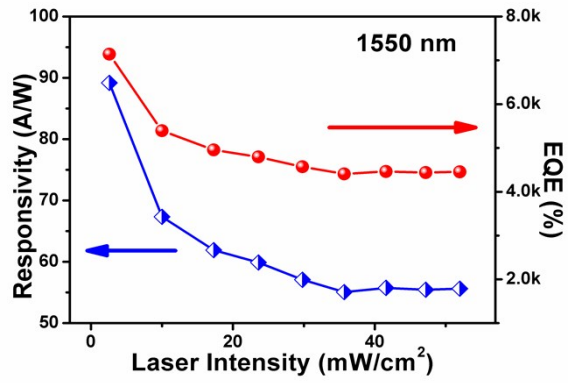

**Figure S9** Photoresponsivity and  $EQE$  of the device versus laser intensity measured at  $V_{ds} = 0.5$  V.

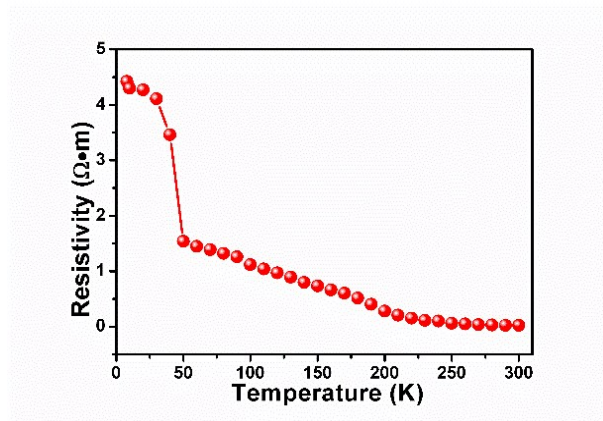

**Figure S10** The resistivity versus temperature ranging from 8 to 300 K.

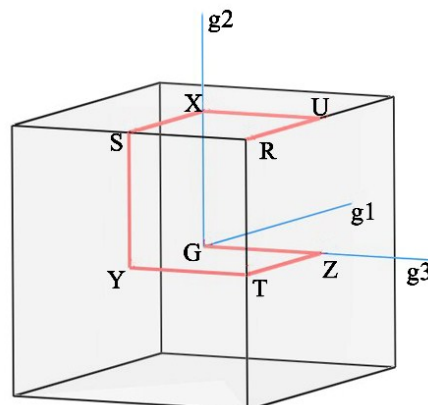

**Figure S11** The Brillouin zone of calculated ZnSb unit cell.

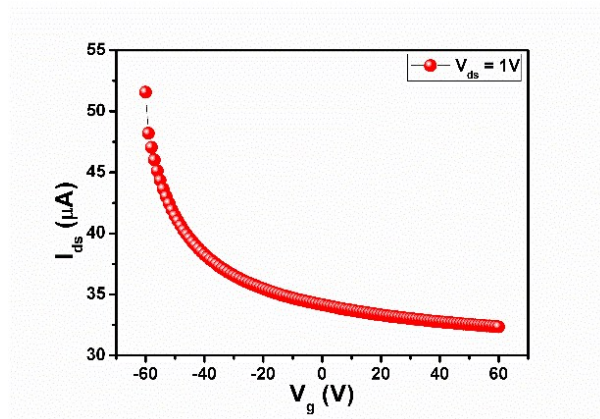

**Figure S12** Transfer characteristic curve of ZnSb nanoplate.

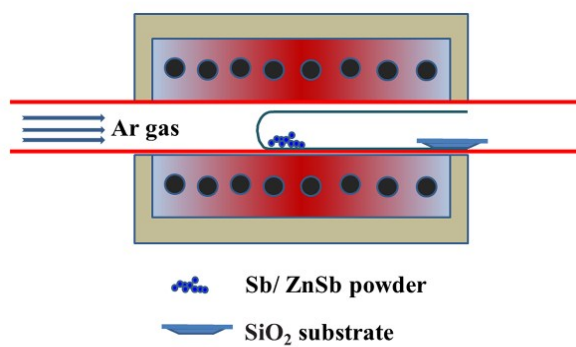

**Figure S13** Schematic diagram of chemical vapor deposition system for synthesizing ZnSb plates.

**Table S1.** Electronic energies (in eV) of ZnSb at some high symmetry points in the Brillouin zone, as calculated from the HSE06-Non-optimization (1.004 eV).

| G-point | Z-point | T-point | Y-point | S-point | X-point | U-point | R-point |
|---------|---------|---------|---------|---------|---------|---------|---------|
| 3.852   | 4.671   | 4.163   | 3.850   | 3.152   | 3.871   | 3.656   | 3.867   |
| 3.764   | 3.988   | 4.158   | 3.843   | 3.146   | 3.858   | 3.648   | 3.853   |
| 3.623   | 3.903   | 3.274   | 3.476   | 3.141   | 3.782   | 3.640   | 3.829   |
| 3.529   | 3.707   | 3.268   | 3.446   | 3.138   | 3.732   | 3.629   | 3.817   |
| 3.434   | 3.130   | 3.209   | 3.042   | 2.636   | 3.634   | 2.314   | 3.263   |
| 3.403   | 2.912   | 3.208   | 3.034   | 2.625   | 3.633   | 2.299   | 3.256   |
| 3.079   | 2.404   | 2.323   | 2.506   | 2.620   | 2.593   | 2.293   | 3.246   |
| 2.689   | 2.217   | 2.307   | 2.506   | 2.618   | 2.577   | 2.284   | 3.237   |
| 2.567   | 1.874   | 2.004   | 2.176   | 1.686   | 2.475   | 1.459   | 1.400   |
| 2.084   | 1.420   | 2.003   | 2.172   | 1.669   | 2.438   | 1.455   | 1.397   |
| 1.898   | 1.111   | 1.940   | 1.556   | 1.666   | 1.140   | 1.414   | 1.363   |
| 1.130   | 1.004   | 1.932   | 1.548   | 1.653   | 1.136   | 1.412   | 1.357   |
| -0.879  | -0.677  | -0.873  | 0.000   | -0.734  | -1.128  | -1.252  | -1.089  |
| -0.904  | -0.815  | -0.885  | -0.001  | -0.758  | -1.181  | -1.259  | -1.101  |
| -1.220  | -1.357  | -1.034  | -0.669  | -0.779  | -1.581  | -1.271  | -1.137  |
| -1.665  | -1.495  | -1.047  | -0.692  | -0.790  | -1.585  | -1.281  | -1.143  |
| -1.741  | -2.067  | -1.796  | -1.155  | -1.537  | -2.243  | -1.545  | -2.480  |
| -2.068  | -2.155  | -1.799  | -1.188  | -1.564  | -2.255  | -1.552  | -2.495  |
| -2.102  | -2.336  | -1.958  | -1.265  | -1.579  | -2.373  | -1.584  | -2.517  |
| -2.279  | -2.383  | -1.964  | -1.276  | -1.597  | -2.384  | -1.594  | -2.531  |
| -2.557  | -2.524  | -2.815  | -2.032  | -2.629  | -2.843  | -3.574  | -2.667  |
| -3.431  | -2.680  | -2.827  | -2.066  | -2.664  | -2.873  | -3.589  | -2.685  |
| -3.449  | -2.915  | -3.183  | -2.761  | -2.675  | -2.882  | -3.599  | -2.691  |
| -3.631  | -3.110  | -3.213  | -2.762  | -2.683  | -2.887  | -3.611  | -2.703  |

**Table S2.** Electronic energies (in eV) of ZnSb at some high symmetry points in the Brillouin zone, as calculated from the HSE06-optimization (0.460 eV).

| G-point | Z-point | T-point | Y-point | S-point | X-point | U-point | R-point |
|---------|---------|---------|---------|---------|---------|---------|---------|
| 4.328   | 4.574   | 3.909   | 3.879   | 3.324   | 3.978   | 3.635   | 4.150   |
| 3.979   | 4.562   | 3.895   | 3.871   | 3.320   | 3.977   | 3.633   | 4.136   |
| 3.783   | 4.451   | 3.880   | 3.813   | 3.307   | 3.948   | 3.621   | 4.110   |
| 3.671   | 4.449   | 3.866   | 3.799   | 3.295   | 3.933   | 3.615   | 4.101   |
| 3.635   | 3.021   | 3.195   | 3.433   | 2.784   | 3.750   | 2.236   | 3.458   |
| 3.592   | 3.012   | 3.183   | 3.428   | 2.777   | 3.727   | 2.215   | 3.453   |
| 3.585   | 2.207   | 3.170   | 2.608   | 2.775   | 2.743   | 2.210   | 3.444   |
| 2.932   | 2.205   | 3.165   | 2.601   | 2.762   | 2.730   | 2.201   | 3.436   |
| 2.614   | 1.576   | 2.151   | 2.207   | 1.705   | 2.474   | 1.445   | 1.463   |
| 1.913   | 1.576   | 2.147   | 2.205   | 1.690   | 2.424   | 1.443   | 1.458   |
| 1.635   | 0.552   | 2.113   | 2.149   | 1.686   | 1.104   | 1.390   | 1.422   |
| 1.030   | 0.551   | 2.106   | 2.144   | 1.676   | 1.093   | 1.386   | 1.413   |
| -1.235  | -0.994  | -1.201  | 0.000   | -0.992  | -1.677  | -1.549  | -1.390  |
| -1.278  | -1.003  | -1.211  | -0.007  | -1.003  | -1.728  | -1.559  | -1.399  |
| -1.537  | -2.001  | -1.231  | -0.803  | -1.042  | -1.818  | -1.572  | -1.442  |
| -2.118  | -2.003  | -1.255  | -0.823  | -1.044  | -1.825  | -1.579  | -1.453  |
| -2.402  | -2.163  | -1.883  | -1.464  | -1.909  | -2.881  | -1.994  | -3.251  |
| -2.419  | -2.170  | -1.909  | -1.490  | -1.935  | -2.886  | -1.999  | -3.260  |
| -2.501  | -3.159  | -1.935  | -1.688  | -1.970  | -2.903  | -2.046  | -3.267  |
| -2.840  | -3.171  | -1.939  | -1.688  | -1.980  | -2.919  | -2.056  | -3.277  |
| -3.065  | -3.211  | -3.248  | -2.397  | -3.183  | -3.423  | -4.459  | -3.287  |
| -4.150  | -3.233  | -3.258  | -2.424  | -3.209  | -3.464  | -4.469  | -3.288  |
| -4.276  | -3.623  | -3.265  | -3.528  | -3.219  | -3.678  | -4.493  | -3.294  |
| -4.456  | -3.625  | -3.273  | -3.528  | -3.221  | -3.706  | -4.500  | -3.301  |



**Table S3.** Electronic energies (in eV) of ZnSb at some high symmetry points in the Brillouin zone, as calculated from the GGA-optimization (0.714 eV).

| G-point | Z-point | T-point | Y-point | S-point | X-point | U-point | R-point |
|---------|---------|---------|---------|---------|---------|---------|---------|
| -3.371  | -3.487  | -3.591  | -3.823  | -3.256  | -3.255  | -3.616  | -3.542  |
| -3.237  | -2.740  | -2.664  | -2.310  | -2.456  | -2.591  | -3.127  | -2.377  |
| -2.970  | -2.740  | -2.664  | -2.310  | -2.456  | -2.591  | -3.127  | -2.377  |
| -2.964  | -2.220  | -2.664  | -1.882  | -2.456  | -2.492  | -3.127  | -2.377  |
| -2.311  | -2.220  | -2.664  | -1.882  | -2.456  | -2.492  | -3.127  | -2.377  |
| -2.203  | -2.207  | -1.245  | -1.206  | -1.336  | -2.178  | -1.552  | -2.347  |
| -1.886  | -2.207  | -1.245  | -1.206  | -1.336  | -2.178  | -1.552  | -2.347  |
| -1.701  | -1.563  | -1.245  | -1.162  | -1.336  | -2.034  | -1.552  | -2.347  |
| -1.540  | -1.563  | -1.245  | -1.162  | -1.336  | -2.034  | -1.552  | -2.347  |
| -1.452  | -1.515  | -0.847  | -0.460  | -0.702  | -1.441  | -1.069  | -0.856  |
| -0.920  | -1.515  | -0.847  | -0.460  | -0.702  | -1.441  | -1.069  | -0.856  |
| -0.742  | -0.536  | -0.847  | 0.000   | -0.702  | -0.964  | -1.069  | -0.856  |
| -0.655  | -0.536  | -0.847  | 0.000   | -0.702  | -0.964  | -1.069  | -0.856  |
| 1.014   | 0.872   | 1.597   | 0.968   | 1.234   | 0.780   | 1.219   | 1.230   |
| 1.141   | 0.872   | 1.597   | 0.968   | 1.234   | 0.780   | 1.219   | 1.230   |
| 1.664   | 1.075   | 1.597   | 1.781   | 1.234   | 2.108   | 1.219   | 1.230   |
| 1.906   | 1.075   | 1.597   | 1.781   | 1.234   | 2.108   | 1.219   | 1.230   |
| 2.030   | 1.793   | 2.700   | 2.303   | 2.352   | 2.261   | 1.895   | 2.640   |
| 2.806   | 1.793   | 2.700   | 2.303   | 2.352   | 2.261   | 1.895   | 2.640   |
| 2.822   | 2.358   | 2.700   | 2.505   | 2.352   | 3.156   | 1.895   | 2.640   |
| 2.978   | 2.358   | 2.700   | 2.505   | 2.352   | 3.156   | 1.895   | 2.640   |
| 3.130   | 3.419   | 3.048   | 2.969   | 2.641   | 3.234   | 3.121   | 3.331   |
| 3.293   | 3.419   | 3.048   | 2.969   | 2.641   | 3.234   | 3.121   | 3.331   |
| 3.376   | 3.575   | 3.048   | 3.275   | 2.641   | 3.357   | 3.121   | 3.331   |
| 3.377   | 3.575   | 3.048   | 3.275   | 2.641   | 3.357   | 3.121   | 3.331   |

**Table S4.** The calculated effective mass of the free carries in ZnSb,  $m_{\perp}/m_0$  and  $m_{//}/m_0$ , the symbols  $\perp$  and  $//$  mean transverse and longitudinal directions,  $m_0$  is the mass of the electron.

| Methods                | $m_{h//}/m_0$ | $m_{h\perp}/m_0$ | $m_e//m_0$ |
|------------------------|---------------|------------------|------------|
| HSE06-Non-optimization | 0.504         | 0.218            | 0.260      |
| HSE06-Optimization     | 0.424         | 0.334            | 0.392      |
| GGA-Optimization       | 0.497         | 0.472            | 0.225      |

**Table S5.** The calculated effective mass of the free carries in ZnSb along different directions,  $m_h/m_0$  and  $m_e/m_0$ ,  $m_0$  is the mass of the electron.

|                         | G→Z   | Z→T   | T→Y   | Y→S   | S→X   | X→U   | U→R   |
|-------------------------|-------|-------|-------|-------|-------|-------|-------|
| HSE06- Non-optimization |       |       |       |       |       |       |       |
| mh/m0                   | /     | 0.291 | 0.111 | 0.826 | 0.448 | 0.326 | 0.453 |
| me/m0                   | 0.489 | 0.272 | 0.557 | 0.288 | 0.110 | 0.647 | 0.369 |
| HSE06-Optimization      |       |       |       |       |       |       |       |
| mh/m0                   | 0.578 | /     | 0.091 | 0.799 | 0.214 | /     | 0.330 |
| me/m0                   | 0.328 | /     | 0.853 | 0.331 | 0.528 | 0.710 | 0.317 |
| GGA-Optimization        |       |       |       |       |       |       |       |
| mh/m0                   | 0.820 | 0.069 | 0.111 | 0.826 | 0.448 | 0.326 | 0.453 |
| me/m0                   | 0.489 | 0.272 | 0.557 | 0.288 | 0.110 | 0.647 | 0.369 |
